# Supplementary material for: TNF Signaling Dictates Myeloid and Non-Myeloid Cell Crosstalk to Execute MCMV-Induced Extrinsic Apoptosis
Source: Viruses. 2020 Oct 28;12(11):1221. doi: 10.3390/v12111221 (PMC7693317; doi:10.3390/v12111221)
Supplement: Supplementary file 1 [file viruses-12-01221-s001.pdf]

Supplemental Figures

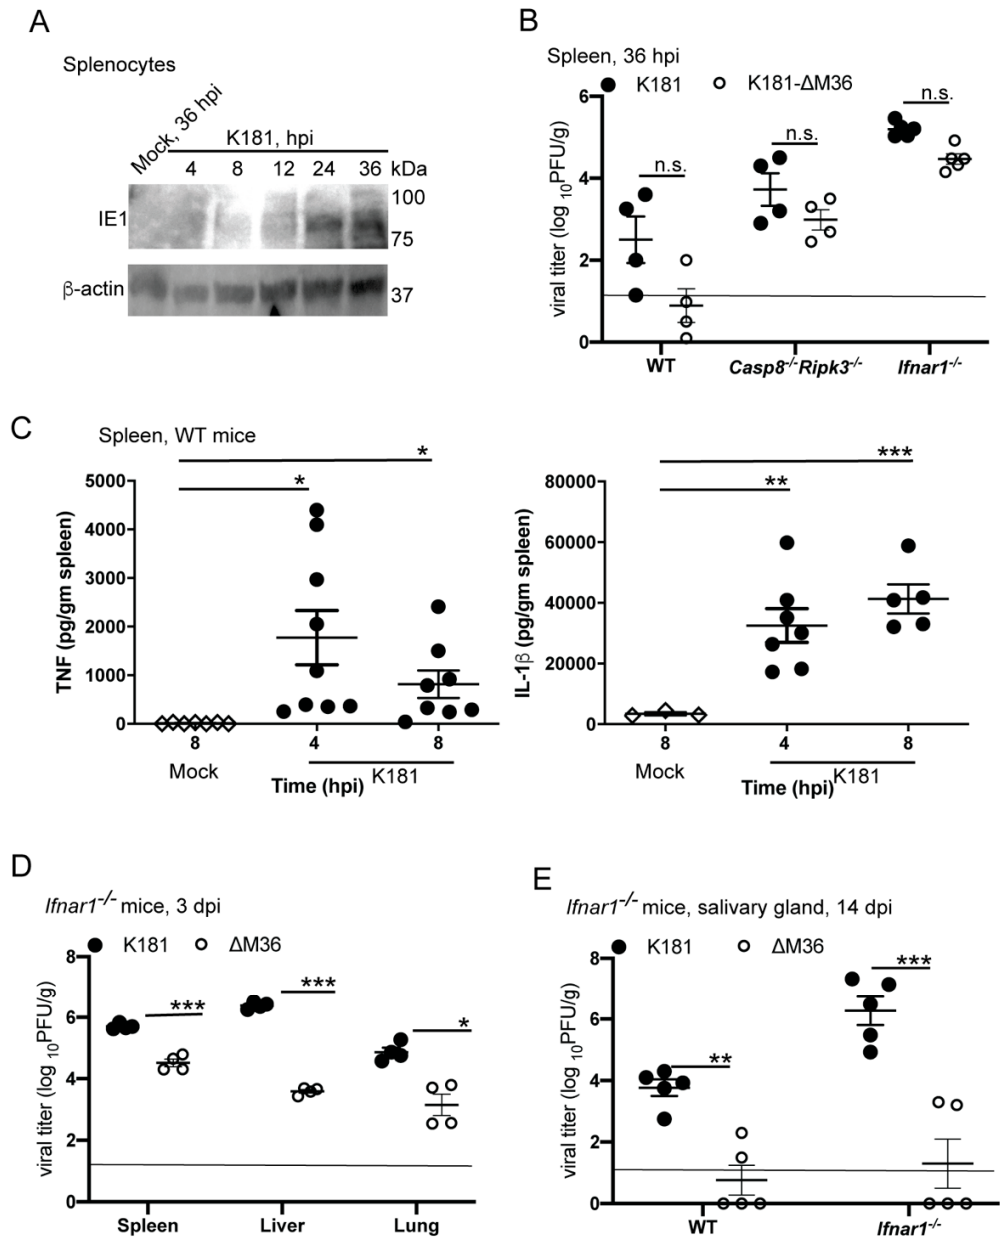

Figure S1. Role of CASP8 and type I IFN signaling during MCMV replication *in vivo*. A. IB blot to determine IE1 (89 kDa) expression levels with  $\beta$ -actin (38.5 kDa) loading control in splenocyte protein lysates extracted from spleens of WT mice inoculated intratracheally with  $10^6$  PFU K181 at indicated times post infection. Each lane represents lysate from a single mouse. Mock splenocytes were harvested from media-inoculated mouse at 36 hpi. B. Viral titer in spleens from WT, *Casp8<sup>-/-</sup>Ripk3<sup>-/-</sup>* or *Ifnar1<sup>-/-</sup>* mice at 36 hpi with indicated viruses. All *in vivo* infections were performed as described for IB of IE1 (A). Each data point represents one mouse. Line inside graph indicates limit of detection for spleen (~18 PFU/g). C. TNF and IL-1 $\beta$  quantities in splenic lysate from WT mice infected with K181 at 4 or 8 hpi. Data are from two independent experiments. D and E. Viral titer in indicated organs from *Ifnar1<sup>-/-</sup>* at 3 dpi (C) or 14 dpi (D). Line indicates limit of detection for each organ for indicated time points (~20 PFU/g at either 3 or 14 dpi). Data is from 1 experiment for each group. Lines top of data points indicate statistical comparison by paired t test using Welch's correction between groups such that \*is <0.05, \*\*is < 0.01, \*\*\*<.001 and n.s. represents non significant.
